# Supplementary material for: Short-Term Dietary Restriction Potentiates an Anti-Inflammatory Circulating Mucosal-Associated Invariant T-Cell Response
Source: MDPI journal article supplement (doi:10.3390/nu16081245), 2024-04-22
Supplement: s1 [file s1]

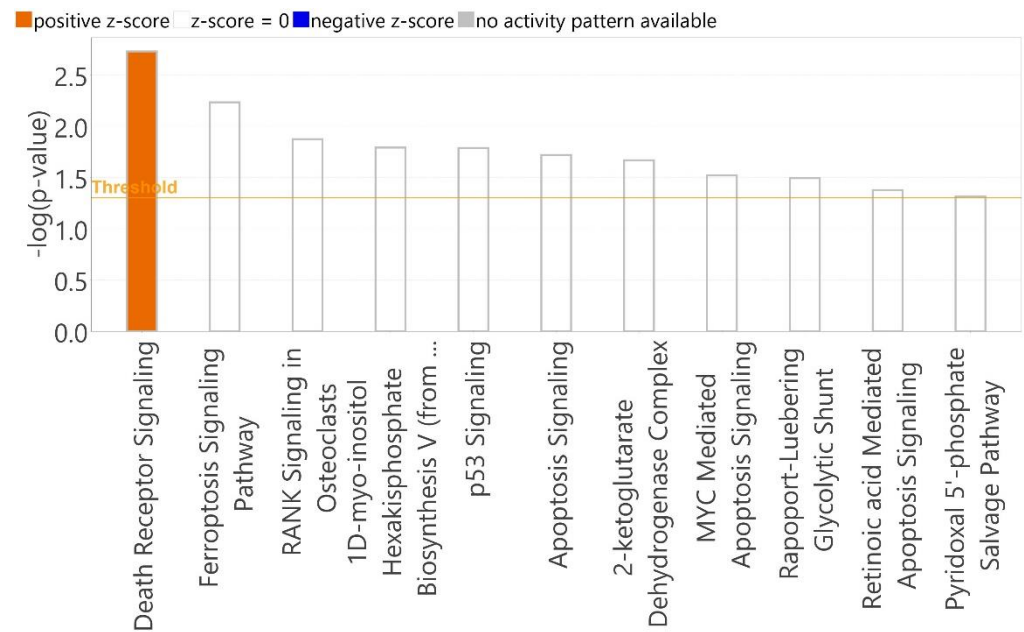

**Figure S1.** All enriched canonical pathways on day 7 compared to baseline.

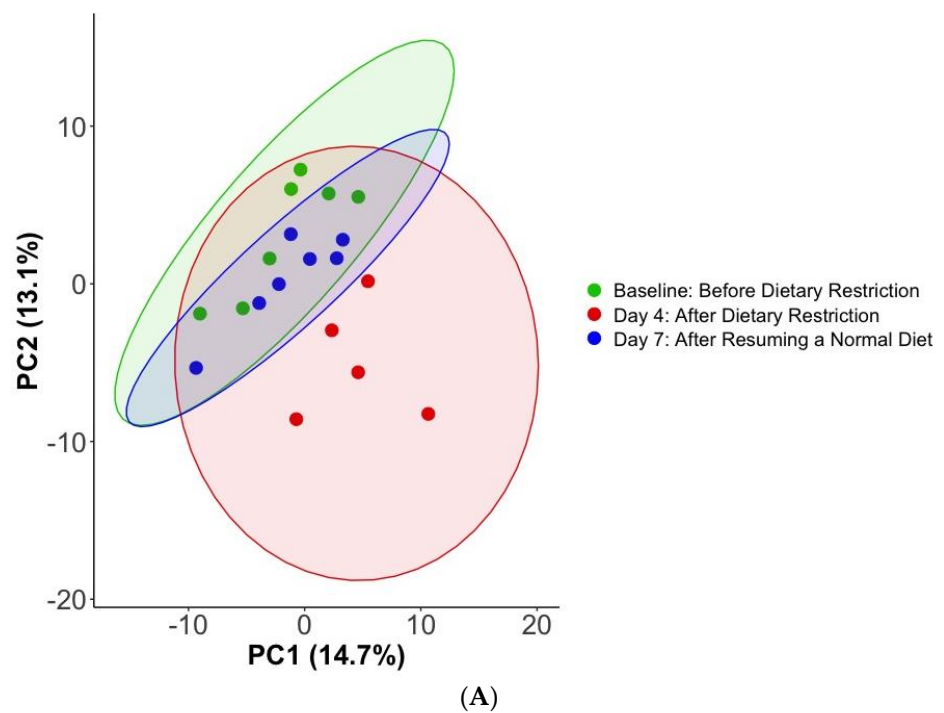

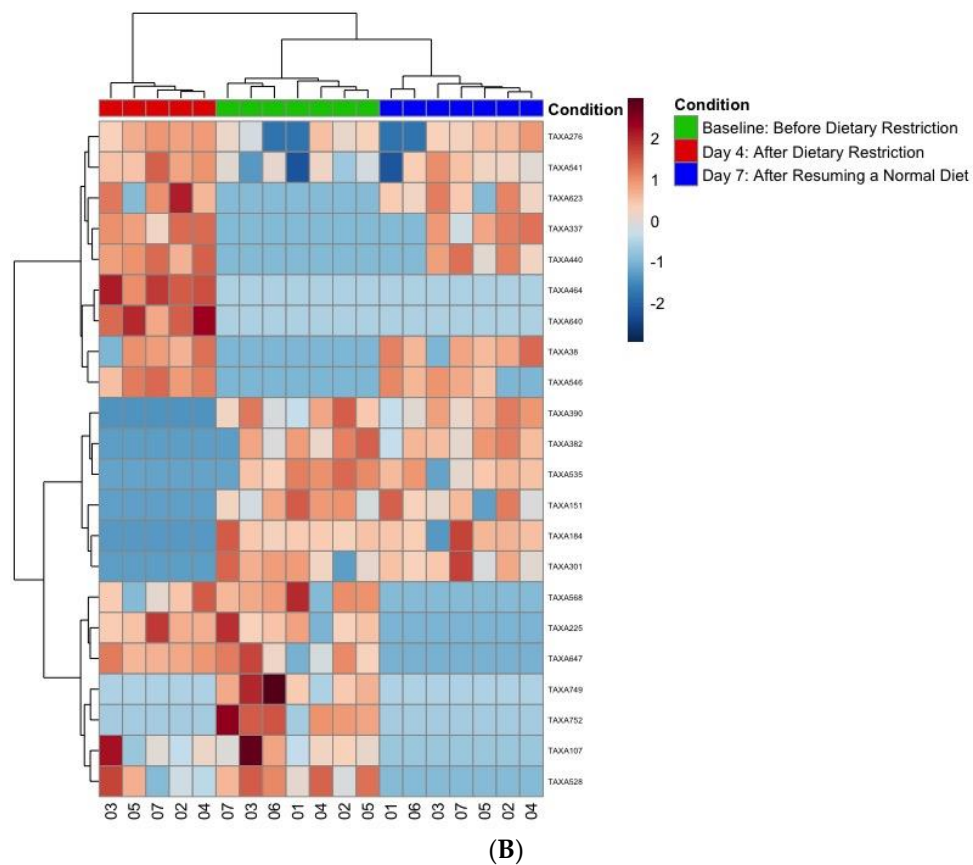

**Figure S2.** Principal component analysis and heatmap of species abundance after prevalence filtering. (A) PCA; (B) Heatmap.

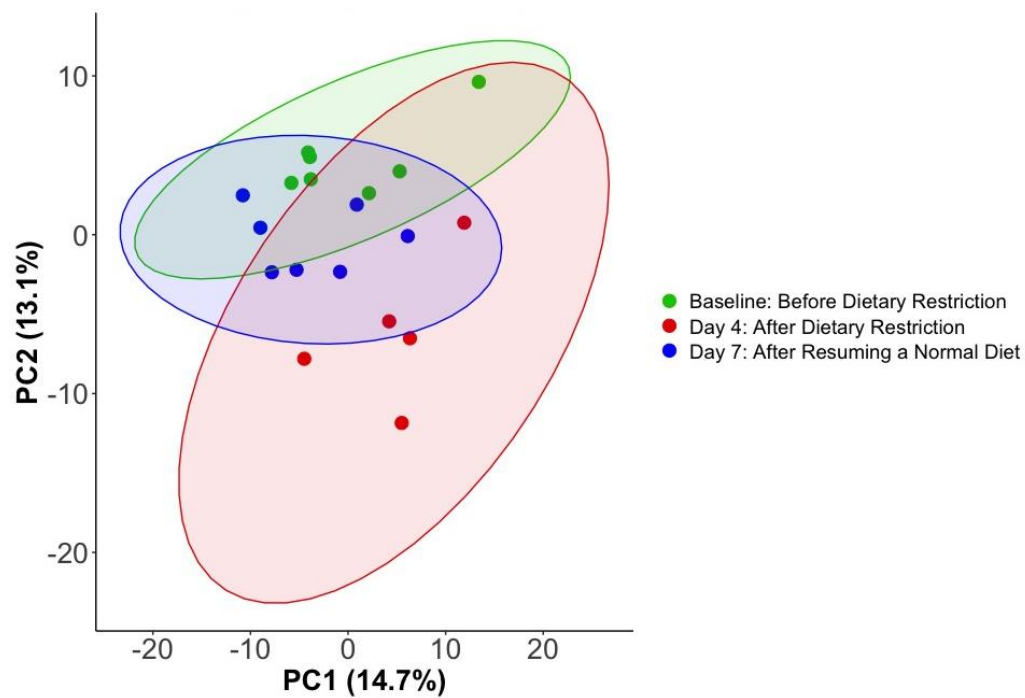

**Figure S3.** Principal component analysis of metabolic pathway changes after prevalence filtering.

**Table S1.** The top 20 differentially expressed genes for each condition compared to baseline. Genes are ordered from the most upregulated (rows 1–10) to the most downregulated (rows 11–20). The log-fold change of each gene is displayed in the “LogFC” column.

| Row ID | Day 2 Genes |       | Day 4 Genes |       | Day 7 Genes |       |
|--------|-------------|-------|-------------|-------|-------------|-------|
|        | Gene ID     | LogFC | Gene ID     | LogFC | Gene ID     | LogFC |
| 1      | ZC4H2       | 0.83  | HSPA1B      | 0.72  | ARID5B      | 0.68  |
| 2      | FAM135A     | 0.67  | KCNQ5       | 0.60  | NLRC5       | 0.67  |
| 3      | STX18-AS1   | 0.64  | HIBADH      | 0.54  | STX18-AS1   | 0.65  |
| 4      | NLRC5       | 0.63  | CHCHD3      | 0.54  | FAM135A     | 0.62  |
| 5      | ALG9        | 0.59  | HSPA1A      | 0.52  | RALGAPA2    | 0.62  |
| 6      | LINC01422   | 0.59  | FAM135A     | 0.51  | STK38L      | 0.60  |
| 7      | KCNQ5       | 0.55  | SRGAP2      | 0.51  | MMS22L      | 0.60  |
| 8      | CD84        | 0.53  | PCCB        | 0.51  | AL359232.1  | 0.58  |
| 9      | ZNF519      | 0.53  | HDAC9       | 0.51  | IFI44L      | 0.57  |
| 10     | IFNG-AS1    | 0.51  | STX6        | 0.49  | ORC5        | 0.57  |
| 11     | BTG2        | −0.87 | ZFP36       | −0.74 | ARRDC3      | −0.86 |
| 12     | NFKBIA      | −0.83 | ID1         | −0.69 | RSRC2       | −0.70 |
| 13     | ZFP36       | −0.80 | ACSL3       | −0.69 | ERCC1       | −0.63 |
| 14     | SLC7A5      | −0.79 | SLC7A5      | −0.67 | AL021918.5  | −0.61 |
| 15     | PIK3IP1     | −0.74 | DCTN4       | −0.66 | CEP19       | −0.55 |
| 16     | GADD45B     | −0.73 | SMAD7       | −0.66 | DCTN4       | −0.54 |
| 17     | FOS         | −0.73 | PRKX        | −0.64 | RPAP2       | −0.54 |
| 18     | IER5        | −0.73 | PMAIP1      | −0.64 | MMP24OS     | −0.53 |
| 19     | AC020916.1  | −0.71 | PDE4B       | −0.64 | NDUFB1      | −0.52 |
| 20     | KDM6B       | −0.67 | NFKBIA      | −0.62 | EFCAB2      | −0.52 |
